# Supplementary material
Source: Springer Nature journal article supplement (https://www.springermedizin.de/resource/supplementary/12879_2013_2437_MOESM1_ESM.pdf/9444588)
Supplement: MOESM1 [file 9444588]

General German population, 2005–2011  
(574 370 696 person-years)

Total hospitalisations, 2005–2011  
(n=125 189 669)

PNTM infection as primary or secondary hospital  
discharge diagnosis (n=5959)

Age-adjusted  
hospitalisation  
rates and APC

Age-specific  
hospitalisation  
rates and APC

Associated secondary  
diagnoses when  
PNTM infection is the  
primary diagnosis  
(n=3102)

Associated primary  
diagnoses when  
PNTM infection is any  
diagnosis  
(n=5959)

APC of associated primary and secondary  
diagnoses (n=5959)
